# Supplementary material for: Highly Z-selective synthesis of α,β-unsaturated amides with the Peterson reaction between α-silylamides and aldehydes
Source: Royal Society of Chemistry journal article supplement (doi:10.1039/b004416o), 2000-01-01
Supplement: b004416o.doc [file b004416o.doc]

**Highly *Z*-Selective Synthesis of **-Unsaturated Amides with the Peterson Reaction between **-Silylamides and Aldehydes**

Satoshi Kojima,* Hiroki Inai, Tsugihiko Hidaka, and Katsuo Ohkata

*Department of Chemistry, Graduate School of Science, Hiroshima University, Kagamiyama, Higashi-Hiroshima 739-8526, Japan. E-mail: skojima@sci.hiroshima-u.ac.jp*

**Supplementary Information**

**General.** Melting points were measured on a Yanaco micro melting point apparatus and are uncorrected. 1H and 13C NMR spectra were measured on a JEOL JNM–LA500 spectrometer with CDCl3 as solvent. 1H NMR chemical shifts are given in relative ppm from either internal TMS (=0.0) or CHCl3 (=7.26). 13C NMR chemical shifts are given in relative ppm from internal CDCl3 (=77.0). High resolution mass spectra were measured on a JEOL JMS-SX102A spectrometer under electron ionization conditions (70 eV). Elemental analyses (CHN) were carried out on a Perkin–Elmer 2400CHN elemental analyzer.

All reactions were carried under N2. THF and ether were freshly distilled from Na-benzophenone prior to use. Liquid aldehydes were distilled before use. Silica gel column chromatography was carried out using Merck 7734 (63-200 mesh) or 9385 (230-400 mesh). Preparative thin layer chromatography was carried out with plates prepared with Merck 7730.

***N,N*-Dibenzyl(triphenylsilyl)acetamide (1a):**

To dibenzylamine (4.04 mL, 21.0 mmol) and triethylamine (3.22 mL, 23.1 mmol) in THF (50 mL) was added acetyl chloride (1.49 mL, 21.0 mmol) at 0 °C. After stirring for 3 h at rt, the solution was quenched with aqueous NaHCO3. After usual workup, crude *N*,*N*-dibenzylacetamide was obtained as a liquid. Without further purification, this was dissolved in THF (10 mL) and added at -78 °C to LDA prepared from *n*-butyllithium (1.50 M in hexane, 28.8 mL, 43.2 mmol) and diisopropylamine (6.0 mL, 42.8 mmol). After warming to 0 °C, the resulting solution was recooled to -78 °C, and triphenylsilyl chloride (6.10 g, 20.7 mmol) in THF (10 mL) was added at this temperature. The solution was quenched with sat. NH4Cl after stirring for 2 h at rt. After usual workup, the product was subjected to column chromatography (silica gel, hexane/ethyl acetate=10:1, v/v) and then recrystallized (hexane-CH2Cl2) to give *N,N*-dibenzyl(triphenylsilyl)acetamide in 76% yield (7.9 g) as colorless crystals.

Mp 111-114 °C.

1H NMR (CDCl3, 500 MHz) 7.59-6.90 (m, 25H), 4.49 (s, 2H), 4.10 (s, 2H), 2.88 (s, 2H).

13C NMR (CDCl3, 125 MHz)  171.9, 137.2, 136.6, 135.0, 133.7, 129.8, 128.8, 128.5, 128.3, 127.9, 127.4, 127.1, 126.4, 50.7, 48.2, 22.6.

HRMS calcd for C34H31NOSi 497.2175, found 497.2177.

Anal. Calcd for C34H31NOSi: C, 82.05; H, 6.28; N,2.81. Found: C, 82.11; H, 6.36; N, 2.79.

***N*,*N*-Dibenzyl(trimethylsilyl)acetamide (1b):**

A procedure similar to that of **1a** was applied. From *N*,*N*-dibenzylacetamide (0.72 g, 3.0 mmol), LDA from *n*-butyllithium (1.53 M in hexane, 2.35 mL, 3.6 mmol) and diisopropylamine (0.51 mL, 3.9 mmol), and trimethylsilyl chloride (0.38 mL, 3.0 mmol) was obtained *N*,*N*-dibenzyl(trimethylsilyl)acetamide in 89% yield (0.79 g) as a colorless oil.

1H NMR (CDCl3, 500 MHz) 7.39-7.16 (m, 10H), 4.59 (s, 2H), 4.39 (s, 2H), 2.11 (s, 2H), 0.14 (s, 9H).

13C NMR (CDCl3, 125 MHz)  172.9, 137.8, 136.6, 128.8, 128.4, 128.3, 127.5, 127.2, 126.4, 50.6, 47.6, 25.5, -0.9.

Anal. Calcd for C19H25NOSi: C, 73.26; H, 8.09; N,4.50. Found: C, 73.34; H, 8.08; N, 4.56.

**General procedures for the Peterson reaction are given as examples of the reaction of benzaldehyde.**

**With KHMDS as base (method A).** To a solution of *N,N*-dibenzyl(triphenylsilyl)acetamide, **1a** (206 mg, 0.415 mmol), in THF (4 mL) cooled to -78 °C was added KHMDS (0.5 M in toluene, 0.98 mL, 0.49 mmol). After stirring for 30 m at 0 °C, the solution was recooled to -78 °C. To this solution was added benzaldehyde (39.0 mg, 0.368 mmol) in THF (2.5 mL), and stirring was continued for 3 h. Water was then added to quench the solution, and extraction was carried out with ether. After usual workup and chromatographic purification by preparative TLC (SiO2, hexane/ethyl acetate=5:1), (*Z*)-*N*,*N*-dibenzylcinnamamide was obtained in 88% yield (106 mg) as a viscous oil.

**With *n*-BuLi as base (method B).** To a solution of *N,N*-dibenzyl(triphenylsilyl)acetamide, **1a** (206 mg, 0.415 mmol), in THF (5 mL) cooled to -78 °C was added *n*-BuLi (1.53 M in hexane, 0.27 mL, 0.42 mmol). After stirring for 30 m at 0 °C, the solution was recooled to -78 °C. To this solution was added benzaldehyde (38.8 mg, 0.366 mmol) in THF (2 mL), and stirring was continued for 1 h, after which the solution was allowed to slowly warm to 0 °C. Water was then added to quench the solution, and extraction was carried out with ether. After usual workup and chromatographic purification by preparative TLC (SiO2, hexane/ethyl acetate=5:1), a mixture of (*Z*)- and (*E*)-*N*,*N*-dibenzylcinnamamide was obtained in 85% yield (102 mg, *Z*:*E*=54:46) as a viscous oil.

**(*Z*)-*N*,*N*-Dibenzyl-3-phenylprop-2-enamide (3a-*Z*):**

1H NMR (CDCl3, 500 MHz) 7.39-7.20 (m, 13H), 7.06 (d, *J* = 6.7 Hz, 2H), 6.66 (d, *J* = 12.8 Hz, 1H), 6.18 (d, *J* = 12.8 Hz, 1H), 4.59 (s, 2H), 4.38(s, 2H).

13C NMR (CDCl3, 125 MHz)  169.0, 136.3, 136.1, 135.2, 133.8, 128.9, 128.7, 128.5, 128.4, 127.5, 127.4, 127.0, 123.0, 50.4, 46.6.

HRMS calcd for C23H21NO 327.1623, found 327.1633.

**(*E*)-*N*,*N*-Dibenzyl-3-phenylprop-2-enamide (3a-*E*):**

Separable from *Z* isomer by multiple TLC (SiO2, hexane/ethyl acetate=5:1) treatment.

Mp 128-131 °C. Colorless solid.

1H NMR (CDCl3, 500 MHz) 7.86 (d, *J* = 15.5 Hz, 1H), 7.47-7.21 (m, 15H), 6.90 (d, *J* = 15.5 Hz, 1H), 4.72 (s, 2H), 4.61(s, 2H).

HRMS calcd for C23H21NO 327.1623, found 327.1626.

**(*Z*)-*N*,*N*-Dibenzyl-3-(4-methoxyphenyl)prop-2-enamide (3b-*Z*):**

Following method A, **1a** (176 mg, 0.353 mmol), KHMDS (0.5 M in toluene, 0.88 mL, 0.44 mmol), and *p*-methoxybenzaldehyde (38.1 mg, 0.280 mmol) gave (*Z*)-*N*,*N*-dibenzyl-3-(4-methoxyphenyl)prop-2-enamide in 87% yield (86.6 mg) as an oil.

Following method B, **1a** (176 mg, 0.353 mmol), *n*-BuLi (1.53 M in hexane, 0.23 mL, 0.35 mmol), and *p*-methoxybenzaldehyde (39.3 mg, 0.289 mmol) gave *N*,*N*-dibenzyl-3-(4-methoxyphenyl)prop-2-enamide in 94% yield (97 mg, *Z*:*E*=69:31) as an oil. The *E*-*Z* isomers could not be separated.

1H NMR (CDCl3, 500 MHz) 7.36-7.27 (m, 10H), 7.09 (d, *J* = 8.5 Hz, 2H), 6.73 (d, *J* = 8.5 Hz, 2H), 6.59 (d, *J* = 12.6 Hz, 1H), 6.05 (d, *J* =12.6 Hz, 1H), 4.59 (s, 2H), 4.39(s, 2H), 3.80 (s, 3H).

13C NMR (CDCl3, 125 MHz)  169.3, 159.7, 136.5 ,136.3, 133.6, 130.0, 129.0, 128.7, 128.5, 127.9, 127.5, 127.4, 127.1, 120.7, 113.7, 55.1, 50.4, 46.6.

HRMS calcd for C24H23NO2 357.1729, found 357.1716.

**(*Z*)-*N*,*N*-Dibenzyl-3-(2-methoxyphenyl)prop-2-enamide (3c-*Z*):**

Following method A, **1a** (176 mg, 0.353 mmol), KHMDS (0.5 M in toluene, 0.88 mL, 0.44 mmol), and *o*-methoxybenzaldehyde (38.6 mg, 0.284 mmol) gave *N*,*N*-dibenzyl-3-(4-methoxyphenyl)prop-2-enamide in 72% yield (72.6 mg, *Z*:*E*=81:19) as an oil. The *E*-*Z* isomers could not be separated. The following data was taken from the mixture.

1H NMR (CDCl3, 500 MHz) 7.46-7.03 (m, 12H), 6.97 (d, *J* = 12.5 Hz, 1H), 6.84-6.77 (m, 2H), 6.18 (d, *J* = 12.5 Hz, 1H), 4.54 (s, 2H), 4.35(s, 2H), 3.76 (s, 3H).

13C NMR (CDCl3, 125 MHz)  169.5, 156.8, 136.5, 136.3, 129.8, 129.7, 129.4, 128.8, 128.7, 128.4, 127.5, 127.3, 127.1, 124.5, 122.7, 120.4, 110.4, 55.3, 50.3, 46.5.

HRMS calcd for C24H23NO2 357.1729, found 357.1723.

**(*Z*)-*N*,*N*-Dibenzyl-3-(4-chlorophenyl)prop-2-enamide (3d-*Z*):**

Following method A, **1a** (206 mg, 0.413 mmol), KHMDS (0.5 M in toluene, 0.85 mL, 0.425 mmol), and *p*-chlorobenzaldehyde (38.9 mg, 0.276 mmol) gave *N*,*N*-dibenzyl-3-(4-chlorophenyl)prop-2-enamide in 91% yield (91.2 mg, *Z*:*E*=88:12) as an oil.

Following method B, **1a** (365 mg, 0.733 mmol), *n*-BuLi (1.53 M in hexane, 0.50 mL, 0.765 mmol), and *p*-chlorobenzaldehyde (51.5 mg, 0.366 mmol) gave *N*,*N*-dibenzyl-3-(4-chlorophenyl)prop-2-enamide in 95% yield (126 mg, *Z*:*E*=43:57) as an oil.

1H NMR (CDCl3, 500 MHz) 7.36-7.25 (m, 10 H), 7.18 (d, *J* = 8.5 Hz, 2H), 7.07 (m, 2H), 6.60 (d, *J* = 12.5 Hz), 6.20 (d, *J* = 12.5 Hz, 1H), 4.57 (s, 2H), 4.38 (s, 2H).

13C NMR (CDCl3, 125 MHz)  168.7, 136.3, 136.0, 134.3, 133.7, 132.8, 129.8, 128.9, 128.8, 128.6, 128.5, 127.7, 127.6, 127.0, 123.7, 50.4, 46.7.

HRMS calcd for C23H2037ClNO 363.1204, found 363.1207.

HRMS calcd for C23H2035ClNO 361.1233, found 361.1225.

**(*E*)-*N*,*N*-Dibenzyl-3-(4-chlorophenyl)prop-2-enamide (3d-*E*):**

Separable from *Z* isomer by multiple TLC (SiO2, hexane/ethyl acetate=5:1) treatment.

Mp: 131-134 °C. Colorless solid.

1H NMR (CDCl3, 500 MHz) 7.80 (d, *J* = 15.5 Hz, 1H), 7.39-7.26 (m, 12H), 7.21 (d, *J* = 7.6 Hz, 2H), 6.86 (d, *J* = 15.5 Hz, 1H), 4.71 (s, 2H), 4.60 (s, 2H).

13C NMR (CDCl3, 125 MHz)  166.9, 142.4, 137.2, 136.6, 135.5, 133.6, 129.0, 129.0, 128.9, 128.6, 128.3, 127.7, 127.5, 126.5, 117.8, 50.0, 48.9.

HRMS calcd for C23H2037ClNO 363.1204, found 363.1217.

HRMS calcd for C23H2035ClNO 361.1233, found 361.1232.

**(*Z*)-*N*,*N*-Dibenzyl-3-(2-furyl)prop-2-enamide (3e-*Z*):**

Following method A, **1a** (164 mg, 0.330 mmol), KHMDS (0.5 M in toluene, 0.67 mL, 0.335 mmol), and furfural (20.8 mg, mmol) gave *N*,*N*-dibenzyl-3-(2-furyl)prop-2-enamide in 92% yield (63.4 mg, *Z*:*E*=91:9) as an oil.

1H NMR (CDCl3, 500 MHz) 7.40-7.24 (m, 9H), 7.14 (d, *J* = 7.0 Hz, 2H), 6.64 (d, *J* = 3.4 Hz, 1H), 6.48 (d, *J* = 12.8 Hz, 1H), 6.37 (dd, *J* = 3.4, 1.8 Hz, 1H), 6.03 (d, *J* = 12.8 Hz, 1H), 4.63 (s, 2H), 4.45 (s, 2H).

13C NMR (CDCl3, 125 MHz)  168.7, 150.8, 143.3, 136.9, 136.4, 129.0, 128.8, 128.4, 127.6, 127.4, 127.0, 122.1, 119.0, 112,7, 111.7, 50.5, 46.7.

HRMS calcd for C21H19NO2 317.1416, found 317.1421.

**(*E*)-*N*,*N*-Dibenzyl-3-(4-furyl)prop-2-enamide (3e-*E*):**

Separable from *Z* isomer by multiple TLC (SiO2, hexane/ethyl acetate=5:1) treatment.

1H NMR (CDCl3, 500 MHz) 7.62 (d, *J* = 14.9 Hz, 1H), 7.41-7.19 (m, 11H), 6.84 (d, *J* = 14.9 Hz, 1H), 6.56 (d, *J* = 3.4 Hz, 1H), 6.43 (dd, *J* = 3.4, 1.8 Hz, 1H), 4.69 (s, 2H), 4.59 (s, 2H).

HRMS calcd for C21H19NO2 317.1416, found 317.1411.

**(*Z*)-*N*,*N*-Dibenzyl-3-(2-pyridyl)prop-2-enamide (3f-*Z*):**

Following method A, **1a** (205 mg, 0.412 mmol), KHMDS (0.5 M in toluene, 0.84 mL, 0.42 mmol), and 2-pyridylaldehyde (39.1 mg, 0.365 mmol) gave *N*,*N*-dibenzyl-3-(2-pyridyl)prop-2-enamide in 47% yield (56.1 mg, *Z*:*E*=59:41) as an oil.

1H NMR (CDCl3, 500 MHz) 8.45 (d, *J* = 5.1 Hz, 1H), 7.57 (td, *J* = 7.3, 1.8 Hz, 1H), 7.45 (d, *J* = 7.3 Hz, 2H), 7.39-7.28 (m, 7H), 7.15-7.13 (m, 3H), 6.67 (d, *J* = 12.5 Hz, 1H), 6.32 (d, *J* = 12.5 Hz, 1H), 4.64 (s, 2H), 4.43 (s, 2H).

13C NMR (CDCl3, 125 MHz)  169.6, 153.6, 149.3, 136.8, 136.6, 136.5, 132.0, 129.1, 128.8, 128.4, 127.5, 127.3, 127.1, 126.7, 123.7, 122.8, 50.5, 46.6.

HRMS calcd for C22H20N2O 328.1576, found 328.1583.

**(*E*)-*N*,*N*-Dibenzyl-3-(2-pyridyl)prop-2-enamide (3f-*E*):**

Separable from *Z* isomer by multiple TLC (SiO2, hexane/ethyl acetate=5:1) treatment.

1H NMR (CDCl3, 500 MHz) 8.57 (d, *J* = 4.3 Hz, 1H), 7.82 (d, *J* = 15.0 Hz, 1H), 7.68 (td, *J* = 7.6, 1.5 Hz, 1H), 7.59 (d, *J* = 15.0 Hz, 1H), 7.46-7.03 (m, 12), 4.69 (s, 2H), 4.65 (s, 2H).

13C NMR (CDCl3, 125 MHz)  166.9, 153.3, 149.8, 142.1, 137.1, 136.9, 136.5, 128.9, 128.6, 128.3, 127.7, 127.4, 126.9, 124.9, 123.9, 121.5, 50.0, 48.3.

HRMS calcd for C25H23N2O 328.1576, found 328.1584.

**(*Z,E*)-*N*,*N*-Dibenzyl-5-phenylpenta-2,4-dienamide (3g-*Z*):**

Following method A, **1a** (181 mg, 0.363 mmol), KHMDS (0.5 M in toluene, 0.72 mL, 0.36 mmol), and cinnamaldehyde (38.5 mg, 0.291 mmol) gave *N*,*N*-dibenzyl-5-phenylpenta-2,4-dienamide in 99% yield (103.5 mg, *E,Z*:*E,E*=81:19) as an oil.

1H NMR (CDCl3, 500 MHz) (ddd, *J* = 15.8, 11.3, 1.2 Hz, 1H), 7.50-7.19 (m, 15H), 6.76 (d, *J* = 15.8 Hz, 1H), 6.62 (ddd, *J* = 11.3, 11.3, 1.2 Hz, 1H), 6.11 (d, *J* = 11.3 Hz, 1H), 4.68 (s, 2H), 4.53 (s, 2H).

HRMS calcd for C25H23NO 353.1780, found 353.1783.

**(*Z*)-*N*,*N*-Dibenzyl-5-phenylpent-2-enamide (3h-*Z*):**

Following method A, **1a** (178 mg, 0.358 mmol), KHMDS (0.5 M in toluene, 0.72 mL, 0.36 mmol), and 3-phenylpropionaldehyde (41.3 mg, 0.308 mmol) gave *N*,*N*-dibenzyl-5-phenylpent-2-enamide in 77% yield (84.1 mg, *Z*:*E*=91:9) as an oil. The *E*-*Z* isomers could not be separated. The following data was taken from the mixture.

1H NMR (CDCl3, 500 MHz) 7.36-7.09 (m, 15H), 6.08 (dt, *J* = 11.6, 1.5 Hz, 1H), 5.96 (dt, *J* = 11.6, 7.0 Hz, 1H), 4.57 (s, 2H), 4.25(s, 2H), 2.80-2.77 (m, 4H).

13C NMR (CDCl3, 125 MHz)  168.0, 141.4, 141.1, 137.0, 136.2, 128.7, 128.4, 128.3, 128.2, 128.1, 127.4, 127.2, 126.4, 125.7, 122.3, 49.9, 47.0, 35.0, 30.9.

HRMS calcd for C25H25NO 355.1909, found 355.1922.

**(*Z*)-*N*,*N*-Dibenzyl-3-cyclohexylprop-2-enamide (3i-*Z*):**

Following method A, **1a** (120 mg, 0.242 mmol), KHMDS (0.5 M in toluene, 0.48 mL, 0.24 mmol), and 2-cyclohexylcarboxyaldehyde (0.48 mg, mmol) gave *N*,*N*-dibenzyl-3-cyclohexylprop-2-enamide in 83% yield (56.0 mg, *Z*:*E*=83:17) as an oil.

1H NMR (CDCl3, 500 MHz) 7.37-7.21 (m, 8H), 7.15 (d, *J* = 7.3 Hz, 2H), 5.99 (d, *J* = 11.5 Hz, 1H), 5.75 (dd, *J* = 11.5, 9.7 Hz, 1H), 4.60 (s, 2H), 4.46 (s, 2H), 2.88-2.79 (m, 1H), 1.79 (m, 5H), 1.39-1.28 (m, 2H), 1.21-1.14 (m, 1H), 1.14-1.04 (m, 2H).

HRMS calcd for C23H27NO 333.2093, found 333.2082 .

**(*E*)-*N*,*N*-Dibenzyl-3-cyclohexylprop-2-enamide (3i-*E*):**

1H NMR (CDCl3, 500 MHz) 7.39-7.21 (m, 8H), 7.17 (d, *J* = 7.3 Hz, 2H), 7.02 (dd, *J* = 15.2, 7.3 Hz, 1H), 6.23 (dd, *J* = 15.2, 1.2 Hz, 1H), 4.64 (s, 2H), 4.50 (s, 2H), 2.15-2.07 (m, 1H), 1.76-1.68 (m, 4H), 1.67-1.60 (m, 1H), 1.31-1.07 (m, 5H).

HRMS calcd for C23H27NO 333.2093, found 333.2083.
